RESEARCH ARTICLE

# The influence of age, anthropometric and metabolic variables on $LDI_{FLARE}$ and corneal confocal microscopy in healthy individuals

Sanjeev Sharma<sup>1</sup>, Victoria Tobin<sup>1</sup>, Prashanth R. J. Vas<sup>2</sup>, Rayaz A. Malik<sup>3</sup>, Gerry Rayman<sup>1\*</sup>

**1** Diabetes Research Unit, The Ipswich Hospital NHS Trust, Ipswich, United Kingdom, **2** Department of Diabetes, The Kings College NHS Foundation Trust, London, United Kingdom, **3** Weill Cornell Medicine-Qatar, Doha, Qatar & Institute of Cardiovascular Medicine, University of Manchester, Manchester, United Kingdom

\* [gerry.rayman@ipswichhospital.nhs.uk](mailto:gerry.rayman@ipswichhospital.nhs.uk)

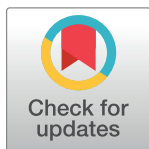

## Abstract

### Introduction

The laser Doppler imaging ( $LDI_{FLARE}$ ) and corneal confocal microscopy (CCM) are reliable markers of small fibre function (SFF) and structure (SFS), respectively, but the impact of potential confounding variables needs to be defined. The objective of this study was to determine the influence of age, anthropometric and biochemical variables on  $LDI_{FLARE}$  and CCM.

### Methods

80 healthy volunteers (43 males) (age:  $39.7 \pm 15.2$  yrs.) underwent  $LDI_{FLARE}$  and CCM assessment and the effect of age, anthropometric and biochemical variables was determined using multivariate analysis.

### Results

There was an age-related decline in  $LDI_{FLARE}$  ( $0.07 \text{ cm}^2/\text{yr}$ ;  $R^2 = 0.669$ ;  $p = <0.0001$ ) and CCM parameters (CNFD:  $0.05 \text{ fibres}/\text{mm}^2/\text{yr}$ ;  $R^2 = 0.590$ ;  $p = <0.0001$ , CNBD:  $0.06 \text{ branches}/\text{mm}^2/\text{yr}$ ;  $R^2 = 0.549$ ;  $p = 0.001$  and CNFL  $0.07 \text{ mm}/\text{mm}^2/\text{yr}$ ;  $R^2 = 0.369$ ;  $p = 0.009$ ). BMI did not influence SFF ( $p = 0.08$ ) but had a significant independent association with CNFD ( $p = 0.01$ ). Fasting triglycerides (TG) independently influenced the  $LDI_{FLARE}$  ( $\beta_c: -0.204$ ;  $p = 0.008$ ) and all CCM indices ( $\beta_c: -0.191$  to  $-0.243$ ;  $p = <0.05$ ).  $HbA_{1c}$  was significantly associated with CNFD only ( $p = 0.001$ ) but not with  $LDI_{FLARE}$ , CNBD or CNFL ( $p = \geq 0.05$ ). Blood pressure and total cholesterol were not associated with  $LDI_{FLARE}$  or any CCM parameters. There was a significant correlation between  $LDI_{FLARE}$  and all CCM parameters ( $p = \leq 0.01$ ).

### Conclusions

This study shows that in healthy controls, both SFF measured by  $LDI_{FLARE}$  and SFS assessed by CCM showed a significant inverse correlation with age and triglycerides, perhaps suggesting the use of age-specific normative values when interpreting these

## OPEN ACCESS

**Citation:** Sharma S, Tobin V, Vas PRJ, Malik RA, Rayman G (2018) The influence of age, anthropometric and metabolic variables on  $LDI_{FLARE}$  and corneal confocal microscopy in healthy individuals. PLoS ONE 13(3): e0193452. <https://doi.org/10.1371/journal.pone.0193452>

**Editor:** Sanjoy Bhattacharya, Bascom Palmer Eye Institute, UNITED STATES

**Received:** May 19, 2017

**Accepted:** February 12, 2018

**Published:** March 8, 2018

**Copyright:** © 2018 Sharma et al. This is an open access article distributed under the terms of the [Creative Commons Attribution License](https://creativecommons.org/licenses/by/4.0/), which permits unrestricted use, distribution, and reproduction in any medium, provided the original author and source are credited.

**Data Availability Statement:** All relevant data are within the paper and its Supporting Information file.

**Funding:** The authors received no specific funding for this work.

**Competing interests:** The authors have declared that no competing interests exist.

**Abbreviations:** CCM, Corneal Confocal Microscopy; CNBD, Corneal Nerve Branch Density; CNFD, Corneal Nerve Fibre Density; CNFL, Corneal

Nerve Fibre Length; DPN, Diabetic Polyneuropathy; FPG, Fasting Plasma Glucose; HbA<sub>1c</sub>, Glycated Haemoglobin A<sub>1c</sub>; HC, Healthy Controls; IENFD, Intra-Epidermal Nerve Fibre Density; LDI<sub>FLARE</sub>, Laser Doppler Imaging flare; NCS, Nerve Conduction Studies; NCV, Nerve Conduction Velocity; QST, Quantitative Sensory Tests; SNAP, Sural Nerve Amplitude; SNCV, Sural Nerve Conduction Velocity; T1DM, Type-1 Diabetes Mellitus; T2DM, Type-2 Diabetes Mellitus; TC, Total Cholesterol; TG, Triglyceride; VPT, Vibration Perception Threshold.

outcomes. Furthermore, this study shows that in healthy controls, despite measuring different neural parameters, both methods correlated significantly with each other.

## Introduction

Diabetic polyneuropathy (DPN) is the commonest chronic complication of diabetes mellitus with a prevalence of up to 50% [1]. Prospective studies in both type-1 (T1DM) and type-2 (T2DM) diabetes have shown that the prevalence of DPN increases with the duration of diabetes [2–4] and is associated with significant morbidity and mortality and health economic cost [5].

There is an increasing drive for the earlier detection of DPN by quantifying large myelinated A $\alpha$  and A $\beta$  and in particular A $\delta$  and C fibres [6, 7]. Traditionally, neuropathic symptoms and signs along with nerve conduction studies were used to diagnose DPN and assess therapeutic outcome [8]. However, there is now increasing evidence to suggest that small fibre dysfunction and damage may precede large fibre neuropathy in subjects with impaired glucose tolerance [9, 10] and diabetes [11, 12] and predicts future-incident DPN [13]. This has led to the development of newer non-invasive techniques to assess small nerve fibre integrity.

Small nerve fibre integrity can be evaluated by quantifying small fibre structure (SFS) and function (SFF). SFS can be evaluated via skin biopsy by measuring IENFD and in the cornea using corneal confocal microscopy (CCM). SFF can be evaluated using the laser Doppler imager flare technique (LDI<sub>FLARE</sub>), quantitative sensory testing (QST) of warm and cold thermal thresholds and the quantitative sudomotor axon reflex test (QSART) [14]. However, IEFND is invasive and requires considerable expertise for accurate quantification and QST is relatively time consuming, subjective and have a high coefficient of variation [15]. QSART remains limited to research centers due to the technical complexity, and again is a relatively time consuming technique [16].

CCM is a rapid, non-invasive ophthalmic technique that can accurately quantify corneal nerve morphology in diabetic patients with minimal and more advanced neuropathy [17], correlates with IENFD [18] and can be quantified objectively and reproducibly using automated algorithms [19, 20]. The LDI<sub>FLARE</sub> method has also been shown to be a sensitive method for the detection of early small fibre dysfunction and also correlates with dermal nerve fibre density [21]. Furthermore, we have shown that the flare size is influenced by long term glycaemia in T1DM whilst features of the metabolic syndrome appear more important determinants in IGT and T2DM [22, 23].

Given the potential utility of CCM and LDI<sub>FLARE</sub> in clinical screening and early identification of DPN, it is important to identify variables which may influence these measurements in a healthy population. Whilst corneal sensitivity may decline with age [24, 25], corneal nerve fibre density has been related in some [26–28] but not all [29–31] studies. There are a limited number of studies showing age-dependent deterioration of both the LDI<sub>FLARE</sub> and thermal threshold testing [32, 33].

This is the first study to evaluate the effect of age and other clinical variables on both small fibre function and structure in a cohort of healthy controls.

## Materials and methods

### Ethical approval

This study was conducted in accordance with the Declaration of Helsinki and approved by the ethics committee of the NRES Committee East of England—Norfolk, UK. (REC reference: 13/EE/0162). All subjects provided written informed consent.

## Study design and selection of participants

Eighty (80) healthy subjects, aged 18 to 80 years, were recruited by invitation. This study is part of a larger longitudinal neuropathy study currently in progress in our centre involving both healthy subjects alongwith Type-1 and Type-2 diabetes patients. The current data presented was obtained as part of this larger study between 2015–2017. Participants were unselected from the local population including hospital staff where the ethnicity is 97% Caucasian.. Subjects with a history of impaired fasting glycaemia, pre-diabetes or diabetes (type-1, type-2 or other specific types) as per diagnostic criteria of the American Diabetes Association, 2017, were excluded [34] based on a fasting blood glucose (FBG) and glycosylated haemoglobinA<sub>1c</sub> (HbA<sub>1c</sub>). Subjects were also excluded if there was any history of hypertriglyceridaemia, alcohol abuse, vitamin B12 and folate deficiency, thyroid or connective tissue disorders, renal or hepatic failure, malignancy, inherited neuropathy or exposure to any toxins including chemotherapy.

## Clinical and biochemical assessment

All participants underwent testing for fasting glucose HbA<sub>1c</sub>, lipids, thyroid, renal and hepatic profiles, vitamin B12 and folate. Overall, five patients—three due to pre-diabetes and two due to subclinical hypothyroidism were excluded. All screened patients underwent detailed neurological examination with the modified Neuropathy Disability Score (NDS) [35]. Vibration perception threshold was measured on the toes using the Neurothesiometer (Horwell Scientific, UK) and expressed as millivolts (mV). Sural nerve conduction velocity (SNCV) and amplitude (SNAP) were assessed in one leg (NC-stat|DPNCheck system (Neurometrix, Waltham, MA).

## Corneal confocal microscopy (Fig 1)

CCM was performed using the laser scanning Heidelberg Retina Tomograph III confocal microscope with Rostock Corneal Module (Heidelberg Engineering GmbH, Dossenheim, Germany). Prior to scanning, topical anaesthesia (Minims<sup>®</sup>: Oxybuprocaine hydrochloride 0.4%; Bausch & Lomb, Kingston upon Thames, Surrey, UK) was applied to the cornea of both eyes followed by topical application of a viscous gel (Viscotears<sup>®</sup>: Carbomer 980 polyacrylic acid 0.2%; Alcon Eye Care, Frimley, Surrey, UK) to form an aqueous medium between the

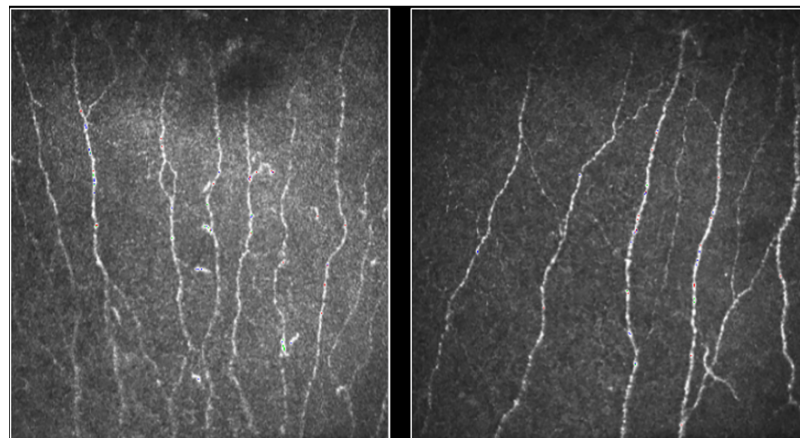

**Fig 1. CCM images at original image x 700 times magnification.** The figure on the left is from a 25-year old HC with CNFD at 61.89 no./mm<sup>2</sup> (>75<sup>th</sup> centile) while on the right is from a 71-year old HC with CNFD at 40.12/mm<sup>2</sup> (<25<sup>th</sup> centile).

<https://doi.org/10.1371/journal.pone.0193452.g001>

applanated corneal surface and disposable TomoCap covering the objective lens. Images were obtained from both eyes using our established methodology [36, 37] with a total duration for examination of both eyes between five to ten minutes. Six best images from both eyes were selected manually and automated image analysis was performed using purpose-written, proprietary software (CCM Image Analysis tool v1.1: Imaging Science and Biomedical Engineering, University of Manchester, Manchester, UK)[19]. The specific parameters measured per frame were: CNFD (number of fibres/mm<sup>2</sup>), CNBD (number of fibres / mm<sup>2</sup>), and CNFL (length in mm/ mm<sup>2</sup>) [36].

### LDI<sub>FLARE</sub> (Fig 2)

LDI<sub>FLARE</sub> was undertaken using our established technique [38]. The procedure is carried out in a temperature-controlled room (25 ± 1 °C) after acclimatization [38]. A 1 cm<sup>2</sup> heating probe was applied to the dorsum of the foot, 2-3cm proximal to the first inter-phalangeal space and the skin was sequentially heated for 6 minutes in a step-wise algorithm: 44 °C for 2 minutes, 46 °C for 1 minute, and 47 °C for 3 minutes and the reference area was scanned using a laser Doppler imager (Moor Instruments, Axminster, UK). On the flux image, the area of the LDI<sub>FLARE</sub> was outlined using the free drawing tool and the results were expressed in cm<sup>2</sup> and measured using the Moor V 5.3 software.

### Calculation of rate of decline of small fibre structure and function with age

The age range in our cohort of HC was between 19 and 74 years and was normally distributed. Using the age-related reference intervals suggested by Wright et al [39], we segregated our HC into four age groups (<30 years, 30–44, 45–59 and >60 years). The percentage difference between the 50th centile of the youngest and oldest group was divided by a factor of 6, covering the six decades, to establish the percentage rate of decline per decade using the formula:

$$\frac{[1 - \{(\text{Median flare area in Oldest group})/(\text{Median flare area in youngest group})\}] \times 100}{\text{Number of decades in years}}$$

### Statistical analysis

Statistical analysis was performed using SPSS (version 20 for Windows) and StatsDirect version 3. Clinical characteristics as quantitative variables are expressed as mean ± standard

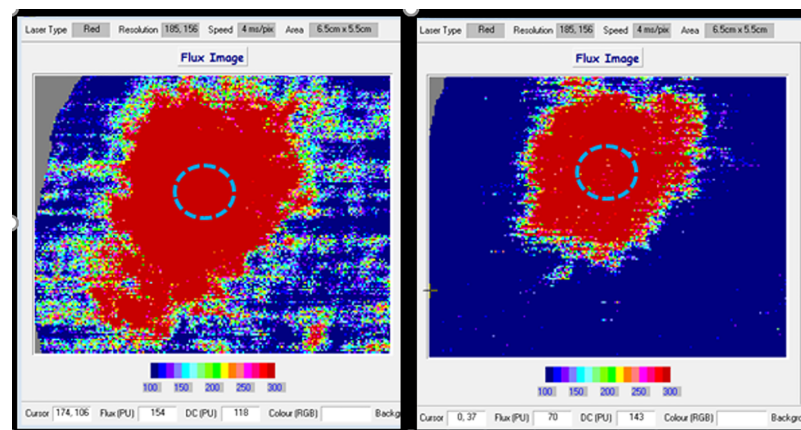

**Fig 2. LDI<sub>FLARE</sub> images.** The image on the left is from a 22-year old HC with LDI<sub>FLARE</sub> at 12.44 cm<sup>2</sup> (>75<sup>th</sup> centile) while image on the right is from a 75-year old HC with LDI<sub>FLARE</sub> at 5.17 cm<sup>2</sup> (<25<sup>th</sup> centile).

<https://doi.org/10.1371/journal.pone.0193452.g002>

deviation. Normal distribution of the data was determined with the Kolmogorov-Smirnov test. To examine independent effect of age, BMI, HbA<sub>1c</sub> and lipid indices on both LDI<sub>FLARE</sub> and CCM parameters, multivariate linear regression was used. Pearson's bivariate correlation was used, to assess the association of small fibre function and structure large fibre methods VPT, SNAP, SNCV) and to examine the relationship between LDI<sub>FLARE</sub> and CCM outcomes. The co-efficient of variation for CCM and LDI<sub>FLARE</sub> is 7.8% and 8.7%, respectively.

## Results

### Relationship between anthropometric variables and small fibre function and structure

80 gender balanced (42 males; 52.5%;  $p = 0.45$ ) subjects with a wide age range of  $39.68 \pm 15.17$  years (19–74 years) were studied. Age, gender, body mass index (BMI), lipid indices and systolic and diastolic blood pressure are shown in Table 1. Multivariate regression analysis showed that increasing age influenced LDI<sub>FLARE</sub> ( $p = <0.0001$ ; beta coefficient ( $\beta$ c):-0.728) and all three CCM parameters: CNFD ( $p = <0.0001$ ;  $\beta$ c:-0.627), CNBD ( $p = 0.001$ ;  $\beta$ c:-0.741) and CNFL ( $p = 0.009$ ;  $\beta$ c:-0.508). There was a weak but significant association between BMI and CNFD. Gender and both systolic and diastolic blood pressures did not correlate with any of the small fibre assessments ( $p = \geq 0.05$ ).

### Relationship between biochemical variables and small fibre function and structure (after multivariate adjustment)

FBG influenced LDI<sub>FLARE</sub> ( $p = 0.009$ ;  $\beta$ c:-0.291) and CNBD ( $p = 0.001$ ;  $\beta$ c:-0.375) but not CNFD ( $p = 0.76$ ) or CNFL ( $p = 0.13$ ). HbA<sub>1c</sub> influenced CNFD ( $p = 0.001$ ;  $\beta$ c:-0.375) but not CNBD, CNFL or LDI<sub>FLARE</sub>, ( $p = \geq 0.05$ ). There was a significant independent correlation

**Table 1. Clinical characteristics of study population and independent effect of age, BMI, HbA<sub>1c</sub> and lipid indices on both LDI<sub>FLARE</sub> and CCM parameters using multivariate linear regression.** Bivariate correlation was used to examine the relationship between the LDI<sub>FLARE</sub>, CCM outcomes and large fibre methods used (VPT, SNCV and SNAP).

| Characteristics                         |             | Correlations*          |                        |                      |                      |
|-----------------------------------------|-------------|------------------------|------------------------|----------------------|----------------------|
|                                         |             | LDI <sub>FLARE</sub>   | CCM                    |                      |                      |
|                                         |             |                        | CNFD                   | CNBD                 | CNFL                 |
| Age (years)                             | 39.68±15.17 | $p = <0.0001$ (-0.728) | $p = <0.0001$ (-0.627) | $p = 0.001$ (-0.741) | $p = 0.009$ (-0.508) |
| BMI (kg/ m <sup>2</sup> )               | 29.09±19.16 | $p = 0.56$ (-0.108)    | $p = 0.03$ (-0.318)    | $p = 0.23$ (-0.114)  | $p = 0.27$ (-0.121)  |
| SBP (mm Hg)                             | 132±21      | $p = 0.81$ (-0.045)    | $p = 0.77$ (-0.067)    | $p = 0.67$ (-0.065)  | $p = 0.80$ (-0.049)  |
| DBP (mm Hg)                             | 76±13       | $p = 0.11$ (-0.109)    | $p = 0.16$ (-0.098)    | $p = 0.19$ (-0.095)  | $p = 0.10$ (-0.105)  |
| FBG (mmol/L)                            | 4.91±0.49   | $p = 0.009$ (-0.291)   | $p = 0.07$ (-0.121)    | $p = 0.001$ (-0.375) | $p = 0.09$ (-0.101)  |
| HbA <sub>1c</sub> (%)                   | 4.86±0.36   | $p = 0.06$ (-0.145)    | $p = 0.001$ (-0.375)   | $p = 0.06$ (-0.167)  | $p = 0.08$ (-0.179)  |
| Triglyceride (mmol/L)                   | 1.89±0.56   | $p = 0.008$ (-0.204)   | $p = 0.004$ (-0.232)   | $p = 0.011$ (-0.243) | $p = 0.04$ (-0.191)  |
| Total Cholesterol (mmol/L)              | 4.50±0.85   | $p = 0.45$ (-0.088)    | $p = 0.41$ (-0.076)    | $p = 0.50$ (-0.075)  | $p = 0.55$ (-0.056)  |
| LDI <sub>FLARE</sub> (cm <sup>2</sup> ) | 9.11±2.17   | -                      | $p = <0.0001$ (0.75)   | $p = 0.01$ (0.46)    | $p = 0.001$ (0.59)   |
| VPT (volts)                             | 6.01±3.75   | $p = 0.11$ (0.12)      | $p = 0.13$ (0.13)      | $p = 0.23$ (0.09)    | $p = 0.04$ (0.30)    |
| SNCV (m/s)                              | 50.23±5.69  | $p = <0.0001$ (0.81)   | $p = 0.01$ (0.44)      | $p = 0.06$ (0.29)    | $p = 0.19$ (0.10)    |
| SNAP (µV)                               | 18.49±4.13  | $p = <0.0001$ (0.77)   | $p = 0.009$            | $p = 0.08$ (0.19)    | $p = 0.22$ (0.11)    |

Variables expressed as Mean ± SD. BMI: body mass index; SBP: systolic blood pressure; DBP: diastolic blood pressure; FBG: fasting blood glucose; HbA<sub>1c</sub>: glycosylated haemoglobin A<sub>1c</sub>; LDI<sub>FLARE</sub>: laser Doppler imager flare; CNFD: corneal nerve fibre density; CNBD: corneal nerve branch density; CNFL: corneal nerve fibre length; VPT: vibration perception threshold; SNCV: sural nerve conduction velocity; SNAP: sural nerve amplitude;

\*  $\beta$ c: beta coefficient where multivariate linear regression used; R<sup>2</sup>: Pearson's correlation of co-efficient of determination). **Significance =  $p < 0.05$ .**

<https://doi.org/10.1371/journal.pone.0193452.t001>



between TG and LDI<sub>FLARE</sub> ( $p = 0.008$ ;  $\beta c: -0.204$ ), CNFD ( $p = 0.004$ ;  $\beta c: -0.232$ ), CNBD ( $p = 0.011$ ;  $\beta c: -0.243$ ) and CNFL ( $p = 0.04$ ;  $\beta c: -0.191$ ).

### Relationship between small fibre function and structure

LDI<sub>FLARE</sub> correlated with all CCM parameters ( $p = \leq 0.01$ ;  $R^2 = 0.46-0.75$ ) (Table 1).

### Relationship with measures of large fibre dysfunction

There was significant correlation between SNCV and SNAP with LDI<sub>FLARE</sub> (both  $p = < 0.0001$ ) and CNFD ( $p = 0.01$  and  $p = 0.009$  respectively) and weakly between VPT and CNFL ( $p = 0.04$ ) (Table 1). VPT ( $p = 0.001$ ), SNCV ( $p = 0.002$ ) and SNAP ( $p = 0.001$ ) were significantly correlated with age; however did not correlate with gender, BMI, blood pressure, FPG, HbA1c or lipid profiles ( $p = \geq 0.05$ ; data individually not presented).

### Rate of decline in small fibre function and structure

The distribution centiles for the four age categories are shown in Table 2. The median (50<sup>th</sup>) centile of the youngest and oldest group was used to derive the rate of decline. Fig 3 shows that the rate of decline of the LDI<sub>FLARE</sub> was  $0.07 \text{ cm}^2/\text{year}$  ( $p = < 0.0001$ ;  $\beta c: -0.728$ ); CNFD was  $0.05 \text{ fibres/mm}^2$  per year ( $p = < 0.0001$ ;  $\beta c: -0.627$ ), CNBD was  $0.06 \text{ branches/mm}^2$  per year ( $p = 0.001$ ;  $\beta c: -0.741$ ) and CNFL was  $0.07 \text{ mm/mm}^2$  per year ( $p = 0.009$ ;  $\beta c: -0.508$ ).

### Discussion

The techniques of CCM and LDI<sub>FLARE</sub> allow rapid, non-invasive detection of early small fibre deficits in DPN [11]. This study demonstrates that age has a highly significant independent

Table 2. Centile charts derived from 80 healthy controls divided into 4 age groups.

| Assessment                              | Centiles                          | <30 years | 30–44 years | 45–59 years | >60 years |
|-----------------------------------------|-----------------------------------|-----------|-------------|-------------|-----------|
| <i>Number of subjects in each group</i> |                                   |           |             |             |           |
|                                         |                                   | 28        | 25          | 15          | 12        |
| LDI <sub>FLARE</sub> (cm <sup>2</sup> ) | 5 <sup>th</sup> centile           | 7.81      | 6.20        | 6.15        | 5.15      |
|                                         | 25 <sup>th</sup> centile          | 9.80      | 8.61        | 6.88        | 5.91      |
|                                         | 50 <sup>th</sup> centile (median) | 10.94     | 9.20        | 7.58        | 6.45      |
|                                         | 75 <sup>th</sup> centile          | 12.35     | 9.88        | 7.89        | 6.78      |
|                                         | 95 <sup>th</sup> centile          | 14.23     | 11.19       | 9.45        | 7.01      |
| CNFD (no/ mm <sup>2</sup> )             | 5 <sup>th</sup> centile           | 46.53     | 40.90       | 41.77       | 37.49     |
|                                         | 25 <sup>th</sup> centile          | 57.58     | 49.48       | 45.87       | 41.19     |
|                                         | 50 <sup>th</sup> centile (median) | 59.87     | 53.47       | 49.45       | 42.40     |
|                                         | 75 <sup>th</sup> centile          | 61.50     | 55.87       | 53.08       | 44.14     |
|                                         | 95 <sup>th</sup> centile          | 65.47     | 59.19       | 51.13       | 47.24     |
| CNBD (no/ mm <sup>2</sup> )             | 5 <sup>th</sup> centile           | 35.42     | 33.34       | 30.08       | 29.66     |
|                                         | 25 <sup>th</sup> centile          | 40.89     | 36.74       | 32.40       | 28.70     |
|                                         | 50 <sup>th</sup> centile (median) | 44.34     | 40.90       | 35.57       | 28.33     |
|                                         | 75 <sup>th</sup> centile          | 46.54     | 41.97       | 38.19       | 26.77     |
|                                         | 95 <sup>th</sup> centile          | 48.29     | 47.60       | 35.45       | 26.01     |
| CNFL (mm/mm <sup>2</sup> )              | 5 <sup>th</sup> centile           | 11.79     | 8.23        | 7.30        | 7.10      |
|                                         | 25 <sup>th</sup> centile          | 15.68     | 12.80       | 11.17       | 10.26     |
|                                         | 50 <sup>th</sup> centile (median) | 17.77     | 14.59       | 14.38       | 10.10     |
|                                         | 75 <sup>th</sup> centile          | 20.60     | 17.42       | 16.34       | 9.78      |
|                                         | 95 <sup>th</sup> centile          | 21.69     | 20.52       | 13.11       | 9.09      |

<https://doi.org/10.1371/journal.pone.0193452.t002>

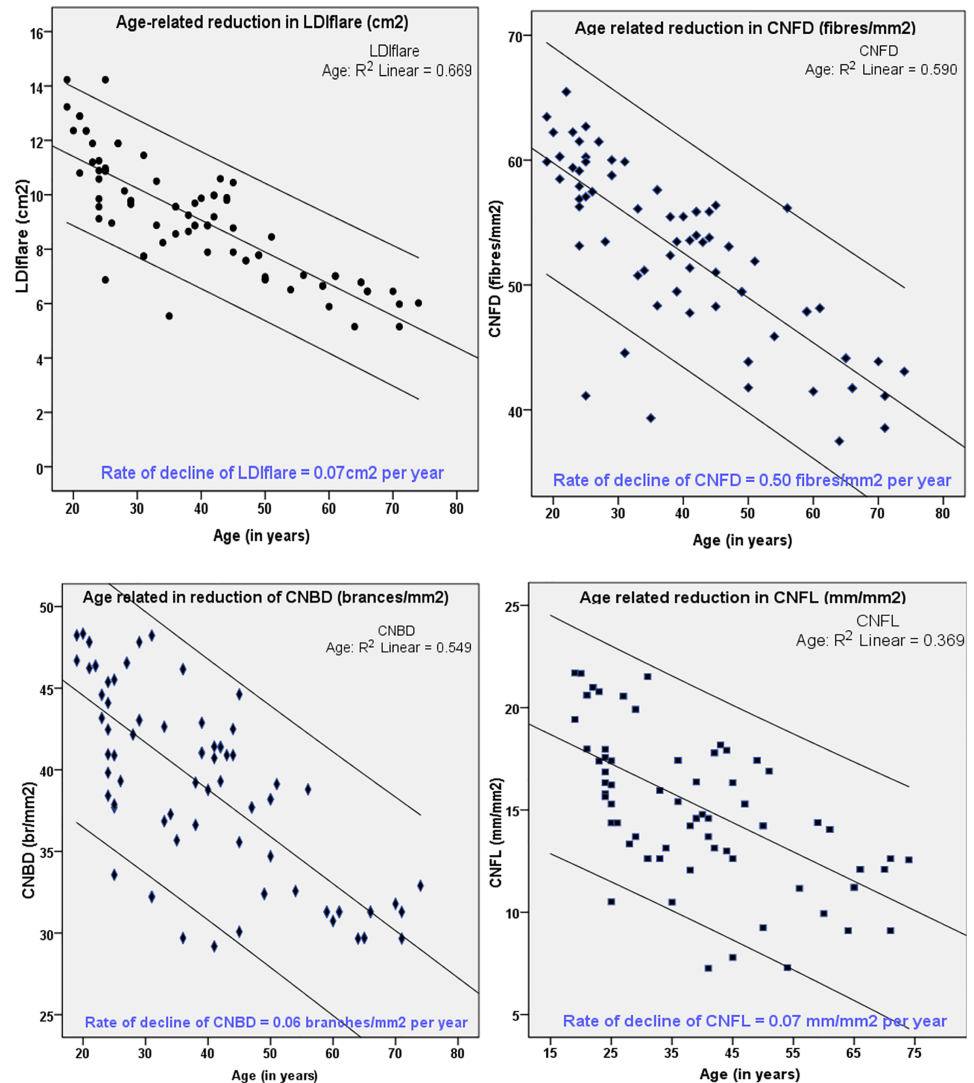

**Fig 3. Relationship between age and both  $LDI_{FLARE}$  and CCM parameters.** The lines above and below the trend line describes the 95th and 5th centiles respectively.

<https://doi.org/10.1371/journal.pone.0193452.g003>

effect on both  $LDI_{FLARE}$  and CCM measures, urging the need to establish age-stratified thresholds when these techniques are deployed for the diagnosis of DPN [40].

Previously age has been shown to influence intraepidermal nerve fibre density in some [41, 42], but not other [43] studies. The influence of anthropometry and biochemical variables has not been examined in healthy subjects. Similarly, for corneal nerve fibre density, Erie et al [29], Marfurt et al [30] and Patel et al [31] found no significant association with age, whilst Grupcheva et al found an independent age-related reduction in corneal nerve density [26]. Neiderer et al found an age-related decrease of sub-basal corneal nerve density of 0.9% per year [27]. In a 3-year prospective study of 49 healthy individuals Dehgani et al reported a significant linear decrease of 0.05 mm/mm<sup>2</sup> in CNFL per one year increase in age [44], which is comparable to the decrease observed in our study. In a recent multicentre collaborative study there was a significant linear age-dependent decrease in CNFD (-0.164/mm<sup>2</sup> per year for men, and -0.161/mm<sup>2</sup> per year for women;  $p < 0.0001$ ) and CNFL ( $R^2 = 0.026$ ;  $p = 0.003$ ), but no change in

CNBD; height, weight, and BMI had no influence [28]. Lin et al [33] have commented that age is the most significant factor in determining sensory thresholds compared with the other factors of gender and anthropometric parameters and similarly, Hafner et al [45] have shown that thermal threshold detection increases with age. We have previously demonstrated a significant age-dependent decline in LDI<sub>FLARE</sub> size ( $r = -0.42$ ;  $p = <0.0001$ ) of  $0.056 \text{ cm}^2$  per year, giving a percentage loss of 5.5% per decade.

The present study found no influence of gender, BMI or blood pressure on both small fibre function and structure in keeping with other studies of CCM and the LDI<sub>FLARE</sub> in HC. [28, 46, 47]. The effects of glycaemic measures on CCM and the LDI<sub>FLARE</sub> were inconsistent; HbA<sub>1c</sub> showed a significant inverse correlation with CNFD but not with the LDI<sub>FLARE</sub>. In contrast, FBG correlated significantly with LDI<sub>FLARE</sub> and CNBD but not with other CCM parameters. Other studies of CCM in healthy controls also show conflicting results. A recent multinational data set report by Tavakoli et al [28] did not find any association between CCM and HbA<sub>1c</sub> although FBG was not done; however in another study by Wu et al [40], HbA<sub>1c</sub> was shown to be the only independent clinical factor to account for variations in corneal nerve fibre length, independent of age. We did not expect an association between FBG and the LDI<sub>FLARE</sub>; our previous study with a different cohort of HC did not demonstrate any association of HbA<sub>1c</sub> or FBG with the LDI<sub>FLARE</sub> but CCM was not performed in this study. Further studies including longitudinal studies will be necessary to determine whether the association between fasting glucose and the LDI<sub>FLARE</sub> is real or a chance statistical finding.

Both the LDI<sub>FLARE</sub> and CCM correlated significantly with fasting triglycerides, but not total cholesterol. The association of TG with diabetic neuropathy has been previously highlighted in both observational [48–50] and interventional [51–53] studies. Indeed we have previously reported an inverse correlation between LDI<sub>FLARE</sub> and TG in normoglycaemic individuals [46]. To our knowledge, the present study is the first to find a relationship between TG and both SFF and SFS in healthy controls.

An intriguing finding of this study is that all three CCM indices (CNFD, CNBD and CNFL) correlated significantly with the LDI<sub>FLARE</sub> despite examining anatomically very different areas and tissues. This suggests that these measures are influenced by common determinants of neural health and could be used interchangeably in healthy controls. However, whether these are affected in the same manner in people with diabetes needs to be determined before suggesting that they can be used interchangeably to estimate early small fibre diabetic neuropathy; additionally, the effect of variables such as glycaemic control, TG, hypertension, other metabolic and inflammatory markers will need to be better defined. This will require high quality longitudinal studies. Additional measures of small fibre structure (IENFD) and function (QST) may provide a more robust and comprehensive analysis.

Another limitation of this study is that the participants were healthy volunteers; therefore, this study cannot be considered to be a true population-based study. Hence, it is not powered to study the effect of other demographic factors like geographical location including altitude, lifestyle choices (e.g. athletes' vs sedentary living), dietary patterns and smoking history. Whilst these are important factors which might further define the utility of these methods in the early detection of DPN, it will require much larger multicentred studies in diverse populations to understand their possible roles.

To conclude, this large cross-sectional study confirms the importance of age when interpreting LDI<sub>FLARE</sub> and CCM to diagnose small fibre neuropathy. Furthermore, it identifies the influence of glycaemia and in particular triglycerides on both small fibre structure and function, even in healthy individuals. Finally, the significant correlation between and CCM in healthy subjects validates their use in studies evaluating small fibre neuropathy.



## Supporting information

**S1 File. Anonymised data set.**  
(XLSX)

## Acknowledgments

We would like to thank the staff at Ipswich hospital and their friends and family members in Suffolk for their contribution by volunteering for this study

## Author Contributions

**Conceptualization:** Prashanth R. J. Vas, Gerry Rayman.

**Data curation:** Sanjeev Sharma, Victoria Tobin, Prashanth R. J. Vas, Gerry Rayman.

**Formal analysis:** Sanjeev Sharma, Gerry Rayman.

**Funding acquisition:** Sanjeev Sharma, Gerry Rayman.

**Investigation:** Sanjeev Sharma, Victoria Tobin, Gerry Rayman.

**Methodology:** Sanjeev Sharma, Victoria Tobin, Prashanth R. J. Vas, Gerry Rayman.

**Project administration:** Sanjeev Sharma, Gerry Rayman.

**Resources:** Sanjeev Sharma, Gerry Rayman.

**Software:** Sanjeev Sharma, Gerry Rayman.

**Supervision:** Gerry Rayman.

**Validation:** Victoria Tobin, Gerry Rayman.

**Visualization:** Rayaz A. Malik, Gerry Rayman.

**Writing – original draft:** Sanjeev Sharma.

**Writing – review & editing:** Sanjeev Sharma, Victoria Tobin, Prashanth R. J. Vas, Rayaz A. Malik, Gerry Rayman.

## References

1. Dyck PJ, Kratz KM, Karnes JL, Litchy WJ, Klein R, Pach JM, et al. The prevalence by staged severity of various types of diabetic neuropathy, retinopathy, and nephropathy in a population-based cohort: the Rochester Diabetic Neuropathy Study. *Neurology*. 1993; 43(4):817–24. PMID: [8469345](https://pubmed.ncbi.nlm.nih.gov/8469345/).
2. Partanen J, Niskanen L, Lehtinen J, Mervaala E, Siitonen O, Uusitupa M. Natural history of peripheral neuropathy in patients with non-insulin-dependent diabetes mellitus. *The New England journal of medicine*. 1995; 333(2):89–94. <https://doi.org/10.1056/NEJM199507133330203> PMID: [7777034](https://pubmed.ncbi.nlm.nih.gov/7777034/).
3. Albers JW, Herman WH, Pop-Busui R, Feldman EL, Martin CL, Cleary PA, et al. Effect of prior intensive insulin treatment during the Diabetes Control and Complications Trial (DCCT) on peripheral neuropathy in type 1 diabetes during the Epidemiology of Diabetes Interventions and Complications (EDIC) Study. *Diabetes Care*. 2010; 33(5):1090–6. <https://doi.org/10.2337/dc09-1941> PMID: [20150297](https://pubmed.ncbi.nlm.nih.gov/20150297/).
4. Pop-Busui R, Herman WH, Feldman EL, Low PA, Martin CL, Cleary PA, et al. DCCT and EDIC studies in type 1 diabetes: lessons for diabetic neuropathy regarding metabolic memory and natural history. *Curr Diab Rep*. 2010; 10(4):276–82. <https://doi.org/10.1007/s11892-010-0120-8> PMID: [20464532](https://pubmed.ncbi.nlm.nih.gov/20464532/).
5. Graz H, D'Souza VK, Alderson DEC, Graz M. Diabetes-related amputations create considerable public health burden in the UK. *Diabetes research and clinical practice*. 2017; 135:158–65. <https://doi.org/10.1016/j.diabres.2017.10.030> PMID: [29133201](https://pubmed.ncbi.nlm.nih.gov/29133201/).
6. Dyck PJ, Lais A, Karnes JL, O'Brien P, Rizza R. Fiber loss is primary and multifocal in sural nerves in diabetic polyneuropathy. *Annals of neurology*. 1986; 19(5):425–39. <https://doi.org/10.1002/ana.410190503> PMID: [3717906](https://pubmed.ncbi.nlm.nih.gov/3717906/).

7. Divisova S, Vlkova E, Hnojckikova M, Skorna M, Nemeč M, Dubovy P, et al. Prediabetes/early diabetes-associated neuropathy predominantly involves sensory small fibres. *J Peripher Nerv Syst*. 2012; 17(3):341–50. <https://doi.org/10.1111/j.1529-8027.2012.00420.x> PMID: 22971096.
8. Tesfaye S, Boulton AJ, Dyck PJ, Freeman R, Horowitz M, Kempler P, et al. Diabetic neuropathies: update on definitions, diagnostic criteria, estimation of severity, and treatments. *Diabetes Care*. 2010; 33(10):2285–93. <https://doi.org/10.2337/dc10-1303> PMID: 20876709.
9. Sumner CJ, Sheth S, Griffin JW, Cornblath DR, Polydefkis M. The spectrum of neuropathy in diabetes and impaired glucose tolerance. *Neurology*. 2003; 60(1):108–11. PMID: 12525727.
10. Smith AG, Ramachandran P, Tripp S, Singleton JR. Epidermal nerve innervation in impaired glucose tolerance and diabetes-associated neuropathy. *Neurology*. 2001; 57(9):1701–4. PMID: 11706115.
11. Breiner A, Lovblom LE, Perkins BA, Bril V. Does the Prevailing Hypothesis That Small-Fiber Dysfunction Precedes Large-Fiber Dysfunction Apply to Type 1 Diabetic Patients? *Diabetes Care*. 2014. <https://doi.org/10.2337/dc13-2005> PMID: 24574353.
12. Pritchard N, Edwards K, Russell AW, Perkins BA, Malik RA, Efron N. Corneal confocal microscopy predicts 4-year incident peripheral neuropathy in type 1 diabetes. *Diabetes Care*. 2015; 38(4):671–5. <https://doi.org/10.2337/dc14-2114> PMID: 25573881.
13. Lovblom LE, Halpern EM, Wu T, Kelly D, Ahmed A, Boulet G, et al. In vivo corneal confocal microscopy and prediction of future-incident neuropathy in type 1 diabetes: a preliminary longitudinal analysis. *Can J Diabetes*. 2015; 39(5):390–7. <https://doi.org/10.1016/j.cjcd.2015.02.006> PMID: 25936902.
14. Malik R, Veves A, Tesfaye S, Smith G, Cameron N, Zochodne D, et al. Small Fiber Neuropathy: Role in the diagnosis of Diabetic Sensorimotor Polyneuropathy. *Diabetes Metab Res Rev*. 2011. <https://doi.org/10.1002/dmrr.1222> PMID: 21695760.
15. Gibbons CH. Small fiber neuropathies. *Continuum*. 2014; 20(5 Peripheral Nervous System Disorders):1398–412. <https://doi.org/10.1212/01.CON.0000455874.68556.02> PMID: 25299289.
16. Shimada H, Kihara M, Kosaka S, Ikeda H, Kawabata K, Tsutada T, et al. Comparison of SSR and QSART in early diabetic neuropathy—the value of length-dependent pattern in QSART. *Auton Neurosci*. 2001; 92(1–2):72–5. [https://doi.org/10.1016/S1566-0702\(01\)00287-9](https://doi.org/10.1016/S1566-0702(01)00287-9) PMID: 11570706.
17. Malik RA, Kallinikos P, Abbott CA, van Schie CH, Morgan P, Efron N, et al. Corneal confocal microscopy: a non-invasive surrogate of nerve fibre damage and repair in diabetic patients. *Diabetologia*. 2003; 46(5):683–8. <https://doi.org/10.1007/s00125-003-1086-8> PMID: 12739016.
18. Balakumar M, Saravanan N, Prabhu D, Regin B, Reddy GB, Mohan V, et al. Benefits of early glycemic control by insulin on sensory neuropathy and cataract in diabetic rats. *Indian journal of experimental biology*. 2013; 51(1):56–64. PMID: 23441480.
19. Dabbah MA, Graham J, Petropoulos IN, Tavakoli M, Malik RA. Automatic analysis of diabetic peripheral neuropathy using multi-scale quantitative morphology of nerve fibres in corneal confocal microscopy imaging. *Med Image Anal*. 2011; 15(5):738–47. <https://doi.org/10.1016/j.media.2011.05.016> PMID: 21719344.
20. Petropoulos IN, Alam U, Fadavi H, Marshall A, Asghar O, Dabbah MA, et al. Rapid automated diagnosis of diabetic peripheral neuropathy with in vivo corneal confocal microscopy. *Investigative ophthalmology & visual science*. 2014; 55(4):2071–8. <https://doi.org/10.1167/iovs.13-13787> PMID: 24569580.
21. Krishnan ST, Quattrini C, Jeziorska M, Malik RA, Rayman G. Abnormal LDIFlare but normal quantitative sensory testing and dermal nerve fiber density in patients with painful diabetic neuropathy. *Diabetes Care*. 2009; 32(3):451–5. <https://doi.org/10.2337/dc08-1453> PMID: 19074993.
22. Vas PR, Green AQ, Rayman G. Small fibre dysfunction, microvascular complications and glycaemic control in type 1 diabetes: a case-control study. *Diabetologia*. 2012; 55(3):795–800. <https://doi.org/10.1007/s00125-011-2417-9> PMID: 22193513.
23. Green AQ, Krishnan S, Finucane FM, Rayman G. Altered C-Fiber Function as an Indicator of Early Peripheral Neuropathy in Individuals With Impaired Glucose Tolerance. *Diabetes Care*. 2010; 33(1):174–6. <https://doi.org/10.2337/dc09-0101> PMID: 20040675
24. Roszkowska AM, Colosi P, D'Angelo P, Ferreri G. Age-related modifications of the corneal endothelium in adults. *International ophthalmology*. 2004; 25(3):163–6. PMID: 15847315.
25. Millodot M. The influence of age on the sensitivity of the cornea. *Investigative ophthalmology & visual science*. 1977; 16(3):240–2. PMID: 844979.
26. Grupcheva CN, Wong T, Riley AF, McGhee CN. Assessing the sub-basal nerve plexus of the living healthy human cornea by in vivo confocal microscopy. *Clinical & experimental ophthalmology*. 2002; 30(3):187–90. PMID: 12010212.
27. Niederer RL, Perumal D, Sherwin T, McGhee CN. Age-related differences in the normal human cornea: a laser scanning in vivo confocal microscopy study. *The British journal of ophthalmology*. 2007; 91(9):1165–9. <https://doi.org/10.1136/bjo.2006.112656> PMID: 17389741.

28. Tavakoli M, Ferdousi M, Petropoulos IN, Morris J, Pritchard N, Zhivov A, et al. Normative values for corneal nerve morphology assessed using corneal confocal microscopy: a multinational normative data set. *Diabetes Care*. 2015; 38(5):838–43. <https://doi.org/10.2337/dc14-2311> PMID: 25633665.
29. Erie JC, McLaren JW, Hodge DO, Bourne WM. The effect of age on the corneal subbasal nerve plexus. *Cornea*. 2005; 24(6):705–9. PMID: 16015090.
30. Marfurt CF, Cox J, Deek S, Dvorscak L. Anatomy of the human corneal innervation. *Experimental eye research*. 2010; 90(4):478–92. <https://doi.org/10.1016/j.exer.2009.12.010> PMID: 20036654.
31. Patel DV, Tavakoli M, Craig JP, Efron N, McGhee CN. Corneal sensitivity and slit scanning in vivo confocal microscopy of the subbasal nerve plexus of the normal central and peripheral human cornea. *Cornea*. 2009; 28(7):735–40. <https://doi.org/10.1097/ICO.0b013e318193e0e3> PMID: 19574916.
32. Vas PR, Rayman G. The rate of decline in small fibre function assessed using axon reflex-mediated neurogenic vasodilatation and the importance of age related centile values to improve the detection of clinical neuropathy. *PloS one*. 2013; 8(7):e69920. <https://doi.org/10.1371/journal.pone.0069920> PMID: 23936119.
33. Lin YH, Hsieh SC, Chao CC, Chang YC, Hsieh ST. Influence of aging on thermal and vibratory thresholds of quantitative sensory testing. *J Peripher Nerv Syst*. 2005; 10(3):269–81. <https://doi.org/10.1111/j.1085-9489.2005.10305.x> PMID: 16221286.
34. American Diabetes A. 2. Classification and Diagnosis of Diabetes. *Diabetes Care*. 2017; 40(Suppl 1): S11–S24. <https://doi.org/10.2337/dc17-S005> PMID: 27979889.
35. Boulton A. Management of Diabetic Peripheral Neuropathy. *Clinical Diabetes*. 2005; 23(1):9–15.
36. Petropoulos IN, Manzoor T, Morgan P, Fadavi H, Asghar O, Alam U, et al. Repeatability of in vivo corneal confocal microscopy to quantify corneal nerve morphology. *Cornea*. 2013; 32(5):e83–9. <https://doi.org/10.1097/ICO.0b013e3182749419> PMID: 23172119.
37. Tavakoli M, Malik RA. Corneal confocal microscopy: a novel non-invasive technique to quantify small fibre pathology in peripheral neuropathies. *Journal of visualized experiments: JoVE*. 2011;(47). <https://doi.org/10.3791/2194> PMID: 21248693.
38. Vas PRJ, Rayman G. Validation of the modified LDIFlare technique: A simple and quick method to assess C-fiber function. *Muscle & Nerve*. 2013; 47(3):351–6. <https://doi.org/10.1002/mus.23532> PMID: 23169592
39. Wright EMR P. A Comparison of Statistical Methods for Age-related Reference Intervals. *J R Statist Soc A*. 1997; 160(Part 1):47–69.
40. Wu T, Ahmed A, Bril V, Orszag A, Ng E, Nwe P, et al. Variables associated with corneal confocal microscopy parameters in healthy volunteers: implications for diabetic neuropathy screening. *Diabet Med*. 2012; 29(9):e297–303. <https://doi.org/10.1111/j.1464-5491.2012.03678.x> PMID: 22519850.
41. Goransson LG, Mellgren SI, Lindal S, Omdal R. The effect of age and gender on epidermal nerve fiber density. *Neurology*. 2004; 62(5):774–7. PMID: 15007129.
42. Lauria G, Bakkers M, Schmitz C, Lombardi R, Penza P, Devigili G, et al. Intraepidermal nerve fiber density at the distal leg: a worldwide normative reference study. *J Peripher Nerv Syst*. 2010; 15(3):202–7. <https://doi.org/10.1111/j.1529-8027.2010.00271.x> PMID: 21040142.
43. Liu Y, Fan X, Wei Y, Piao Z, Jiang X. Intraepidermal nerve fiber density of healthy human. *Neurological research*. 2014; 36(10):911–4. <https://doi.org/10.1179/1743132814Y.0000000377> PMID: 24785396.
44. Dehghani C, Pritchard N, Edwards K, Russell AW, Malik RA, Efron N. Fully automated, semiautomated, and manual morphometric analysis of corneal subbasal nerve plexus in individuals with and without diabetes. *Cornea*. 2014; 33(7):696–702. <https://doi.org/10.1097/ICO.000000000000152> PMID: 24886994.
45. Hafner J, Lee G, Joester J, Lynch M, Barnes EH, Wrigley PJ, et al. Thermal quantitative sensory testing: a study of 101 control subjects. *J Clin Neurosci*. 2015; 22(3):588–91. <https://doi.org/10.1016/j.jocn.2014.09.017> PMID: 25624058.
46. Vas PR, Sharma S, Rayman G. LDIFlare small fiber function in normal glucose tolerant subjects with and without hypertriglyceridemia. *Muscle Nerve*. 2014. <https://doi.org/10.1002/mus.24504> PMID: 25363244.
47. Xiong Q, Lu B, Ye HY, Liu SY, Zheng HP, Zhang RY, et al. Corneal confocal microscopy as a non-invasive test to assess diabetic peripheral neuropathy. *Diabetes research and clinical practice*. 2017. <https://doi.org/10.1016/j.diabres.2017.11.026> PMID: 29221815.
48. Tesfaye S, Selvarajah D. The Eurodiab study: what has this taught us about diabetic peripheral neuropathy? *Curr Diab Rep*. 2009; 9(6):432–4. PMID: 19954687.
49. Wiggin TD, Sullivan KA, Pop-Busui R, Amato A, Sima AA, Feldman EL. Elevated triglycerides correlate with progression of diabetic neuropathy. *Diabetes*. 2009; 58(7):1634–40. <https://doi.org/10.2337/db08-1771> PMID: 19411614.

50. Smith AG, Singleton JR. Obesity and hyperlipidemia are risk factors for early diabetic neuropathy. *J Diabetes Complications*. 2013; 27(5):436–42. <https://doi.org/10.1016/j.jdiacomp.2013.04.003> PMID: [23731827](https://pubmed.ncbi.nlm.nih.gov/23731827/).
51. Rajamani K, Colman PG, Li LP, Best JD, Voysey M, D'Emden MC, et al. Effect of fenofibrate on amputation events in people with type 2 diabetes mellitus (FIELD study): a prespecified analysis of a randomised controlled trial. *Lancet*. 2009; 373(9677):1780–8. [https://doi.org/10.1016/S0140-6736\(09\)60698-X](https://doi.org/10.1016/S0140-6736(09)60698-X) PMID: [19465233](https://pubmed.ncbi.nlm.nih.gov/19465233/).
52. Cho YR, Lim JH, Kim MY, Kim TW, Hong BY, Kim YS, et al. Therapeutic effects of fenofibrate on diabetic peripheral neuropathy by improving endothelial and neural survival in db/db mice. *PLoS one*. 2014; 9(1):e83204. <https://doi.org/10.1371/journal.pone.0083204> PMID: [24392081](https://pubmed.ncbi.nlm.nih.gov/24392081/).
53. Davis TM, Yeap BB, Davis WA, Bruce DG. Lipid-lowering therapy and peripheral sensory neuropathy in type 2 diabetes: the Fremantle Diabetes Study. *Diabetologia*. 2008; 51(4):562–6. <https://doi.org/10.1007/s00125-007-0919-2> PMID: [18193189](https://pubmed.ncbi.nlm.nih.gov/18193189/).
